# Supplementary material
Source: ML conference proceedings conference paper supplement (https://openreview.net/forum?id=UQ42dE8gKr)
Supplement: supplementary_material [file attachment]

---

# Supplementary: Towards Effective Synthetic Data Sampling for Domain Adaptive Pose Estimation

---

Isha Dua\* Arjun Sharma\* Shuaib Ahmed Rahul Tallamraju  
Mercedes-Benz Research and Development India

{isha.dua, arjun.a.sharma, shuaib.ahmed, rahul.tallamraju}@mercedes-benz.com

## 1 Dataset

**SURREAL**[5] is a synthetically-generated dataset rendered from sequences of human motion capture data. The dataset has 6 million labeled frames of human body poses covering a wide variety of actions.

**Leeds Sports Pose** [3] (LSP) is a real-world outdoor human pose dataset capturing individuals in a wide range of poses, including challenging scenarios with occlusions and intricate body positions. Comprising 2000 images, it provides annotations for key human body joint locations, primarily gathered during sports activities.

**Human3.6M** [1] (H3.6M) is a real-world video dataset for human body pose estimation that includes data of diverse indoor activities. It has a total of 3.6 million frames. We follow the training and evaluation splits defined in [4]. The dataset has 5 subjects (S1, S5, S6, S7, S8) for training and the remaining 2 subjects (S9, S11) for testing. This split is typically adopted to train and evaluate models for human pose estimation.

**Rendered Hand Pose Dataset** [7] (RHD), is a synthetic dataset for the task of hand pose estimation. It encompasses a wide range of hand poses captured under varying lighting conditions and comprises 41.2k training images, 2.7k test images, and annotations for 21 hand keypoints.

**Hand-3D-Studio dataset** [6] (H3D), abbreviated as H3D, is a real-world dataset capturing multi-view indoor hand poses. It has a collection of 22k frames. Following a similar partitioning approach as used in the RegDA [2] framework, a subset of 3.2k frames is designated as the test set.

## 2 Additional Qualitative Results

### References

- [1] Catalin Ionescu, Dragos Papava, Vlad Olaru, and Cristian Sminchisescu. Human3.6m: Large scale datasets and predictive methods for 3d human sensing in natural environments. *IEEE Transactions on Pattern Analysis and Machine Intelligence*, 36:1325–1339, 2014.
- [2] Junguang Jiang, Yifei Ji, Ximei Wang, Yufeng Liu, Jianmin Wang, and Mingsheng Long. Regressive domain adaptation for unsupervised keypoint detection. *2021 IEEE/CVF Conference on Computer Vision and Pattern Recognition (CVPR)*, pages 6776–6785, 2021.
- [3] Sam Johnson and Mark Everingham. Clustered pose and nonlinear appearance models for human pose estimation. In *British Machine Vision Conference*, 2010.
- [4] Sijin Li and Antoni B. Chan. 3d human pose estimation from monocular images with deep convolutional neural network. In *Asian Conference on Computer Vision*, 2014.

---

\*Both authors contributed equally.

| Ground Truth                                                                        | UDAPE                                                                                                               | UDAPE VAE-HM                                                                                                         |
|-------------------------------------------------------------------------------------|---------------------------------------------------------------------------------------------------------------------|----------------------------------------------------------------------------------------------------------------------|
|    | EvalSket - 0.49<br>Acc - 0.71<br>  | EvalSket - 0.69<br>Acc - 0.71<br>  |
|    | EvalSket - 0.48<br>Acc - 0.46<br>  | EvalSket - 0.78<br>Acc - 0.62<br>  |
|  | EvalSket - 0.88<br>Acc - 0.8<br> | EvalSket - 0.86<br>Acc - 0.9<br> |

Figure 1: More qualitative results on SURREAL  $\rightarrow$  LSP

- [5] Gül Varol, Javier Romero, Xavier Martin, Naureen Mahmood, Michael J. Black, Ivan Laptev, and Cordelia Schmid. Learning from synthetic humans. *2017 IEEE Conference on Computer Vision and Pattern Recognition (CVPR)*, pages 4627–4635, 2017.
- [6] Zheng Fa Zhao, Tianyao Wang, Siyu Xia, and Yangang Wang. Hand-3d-studio: A new multi-view system for 3d hand reconstruction. *ICASSP 2020 - 2020 IEEE International Conference on Acoustics, Speech and Signal Processing (ICASSP)*, pages 2478–2482, 2020.
- [7] Christiane Zimmermann and Thomas Brox. Learning to estimate 3d hand pose from single rgb images. *2017 IEEE International Conference on Computer Vision (ICCV)*, pages 4913–4921, 2017.

| Ground Truth                                                                        | UDAPE                                                                                                                                                   | UDAPE VAE-HM                                                                                                                                             |
|-------------------------------------------------------------------------------------|---------------------------------------------------------------------------------------------------------------------------------------------------------|----------------------------------------------------------------------------------------------------------------------------------------------------------|
|    | <p data-bbox="732 688 894 737">EvalSket - 0.07<br/>Acc - 0.08</p>      | <p data-bbox="998 688 1161 737">EvalSket - 0.89<br/>Acc - 0.08</p>     |
|  | <p data-bbox="732 966 894 1014">EvalSket - 0.24<br/>Acc - 0.79</p>   | <p data-bbox="998 966 1161 1014">EvalSket - 0.91<br/>Acc - 0.64</p>  |
|  | <p data-bbox="732 1243 894 1291">EvalSket - 0.17<br/>Acc - 0.27</p>  | <p data-bbox="998 1243 1161 1291">EvalSket - 0.2<br/>Acc - 0.18</p>  |

Figure 2: More qualitative results on  $SURREAL \rightarrow LSP$

| Ground Truth                                                                        | UDAPE                                                                                                                                                   | UDAPE VAE-HM                                                                                                                                              |
|-------------------------------------------------------------------------------------|---------------------------------------------------------------------------------------------------------------------------------------------------------|-----------------------------------------------------------------------------------------------------------------------------------------------------------|
|    | <p data-bbox="727 646 891 695">EvalSket - 0.68<br/>Acc - 0.45</p>      | <p data-bbox="982 646 1146 695">EvalSket - 0.71<br/>Acc - 0.55</p>      |
|  | <p data-bbox="727 961 891 1010">EvalSket - 0.14<br/>Acc - 0.86</p>   | <p data-bbox="982 961 1146 1010">EvalSket - 0.15<br/>Acc - 0.86</p>   |
|  | <p data-bbox="727 1270 891 1318">EvalSket - 0.52<br/>Acc - 0.15</p>  | <p data-bbox="982 1270 1146 1318">EvalSket - 0.65<br/>Acc - 0.08</p>  |

Figure 3: More qualitative results on  $SURREAL \rightarrow LSP$
